# Supplementary material for: Construction of a sol–gel derived ternary CuZn/FeOx nanostructure for catalytic transfer hydrogenation of furfural
Source: Royal Society of Chemistry journal article supplement (doi:10.1039/d2se01638a), 2023-01-01
Supplement: d2se01638a1.pdf [file d2se01638a1.pdf]

## **Supporting Information**

### **Construction of Sol-gel derived Ternary CuZn/FeO<sub>x</sub> Nanostructure for Catalytic Transfer Hydrogenation of Furfural**

Tao Wang, Yuan Cheng, Hongyu Niu, Shaojie Li, Jingjie Luo,\* Changhai Liang\*

Laboratory of Advanced Materials & Catalytic Engineering (AMCE), School of Chemical  
Engineering, Dalian University of Technology, Panjin 124221, China

\*Corresponding author. Tel/Fax: +86-411-84986353;

E-mail: jingjie.luo@dlut.edu.cn (J. Luo) & changhai@dlut.edu.cn (C. Liang)

## Table contents

Figure S1.  $N_2$  adsorption–desorption isotherms and pore size distributions of Cu/FeO<sub>x</sub>(280) and CuZn/FeO<sub>x</sub>(280) catalysts by sol-gel and CuZn/FeO<sub>x</sub>(DP) by deposition-precipitation.

Figure S2.  $H_2$ -TPR profiles of precursors after calcined at 500 °C without further thermal reduction.

Figure S3. Catalytic performance of CuZn/FeO<sub>x</sub>(280) for the CTH process of FUR as a function of reaction temperature.

Figure S4. HAADF-STEM elemental mappings of CuZn/FeO<sub>x</sub>(250).

Figure S5. TEM images of CuZn/FeO<sub>x</sub>(280) catalyst.

Figure S6. TEM images and HAADF-STEM elemental mappings of CuZn/FeO<sub>x</sub>(350).

Figure S7. TEM images and HAADF-STEM elemental mappings of CuZn/FeO<sub>x</sub>(DP) synthesized by deposition-precipitation.

Figure S8. XPS spectra of Cu 2*p* core level of the Cu/FeO<sub>x</sub> and CuZn/FeO<sub>x</sub> catalysts.

Figure S9. XPS spectra of Zn 2*p* core level of (a) Cu/FeO<sub>x</sub> and CuZn/FeO<sub>x</sub> by sol-gel methods, and (b) CuZn/FeO<sub>x</sub> catalysts synthesized by conventional methods pre-reduced at 280 °C.

Figure S10. XPS spectra of Cu 2*p* core level of the CuZn/FeO<sub>x</sub> catalysts by different methods.

Figure S11. Cu LMM XPS spectra of the CuZn/FeO<sub>x</sub> catalysts by different methods.

Figure S12. XPS spectra of Fe 2*p* core level of the CuZn/FeO<sub>x</sub> catalysts by different methods.

Figure S13. The reaction rates by different catalysts changed with the (a) surface percentage of Cu<sup>0</sup>, (b) percentage of Cu<sup>+</sup>, and (c) percentage of Cu<sup>2+</sup>.

Figure S14. The CTH reaction mechanism of FUR using CuZn/FeO<sub>x</sub> catalysts.

Figure S15. FUR conversion and product distribution during cycle reaction by CuZn/FeO<sub>x</sub>(280).

Figure S16. TEM images and the HAADF-STEM elemental mappings of CuZn/FeO<sub>x</sub>(280) after reaction.

Table S1. Structure and surface information of Cu catalysts according to XRD and XPS data.

Table S2. Surface acid sites in terms of the NH<sub>3</sub> desorption amount based on the NH<sub>3</sub>-TPD profiles.

Table S3. Comparison of specific rates in the current work and the reported literature.



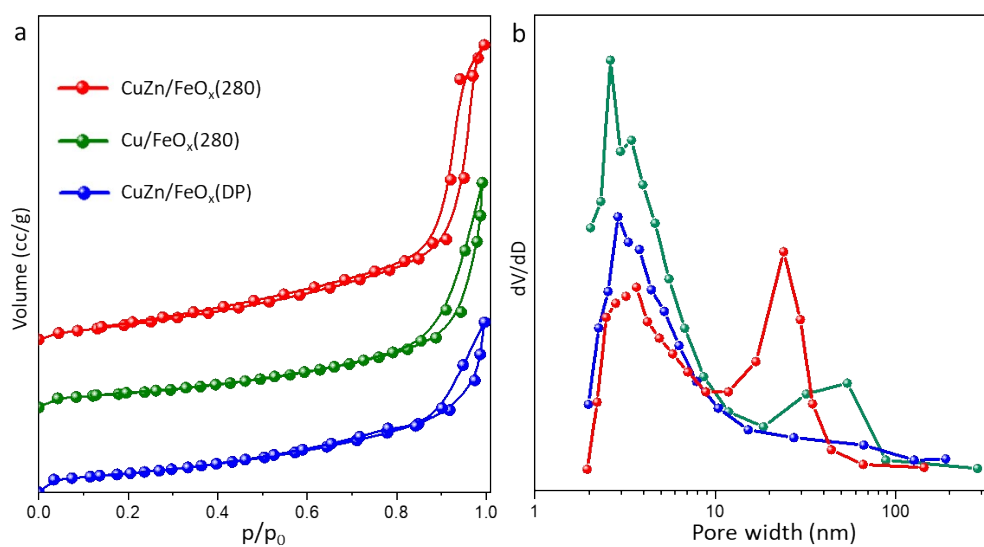

**Figure S1.** N<sub>2</sub> adsorption–desorption isotherms and pore size distributions of Cu/FeO<sub>x</sub>(280) and CuZn/FeO<sub>x</sub>(280) catalysts by sol-gel and CuZn/FeO<sub>x</sub>(DP) by deposition-precipitation.

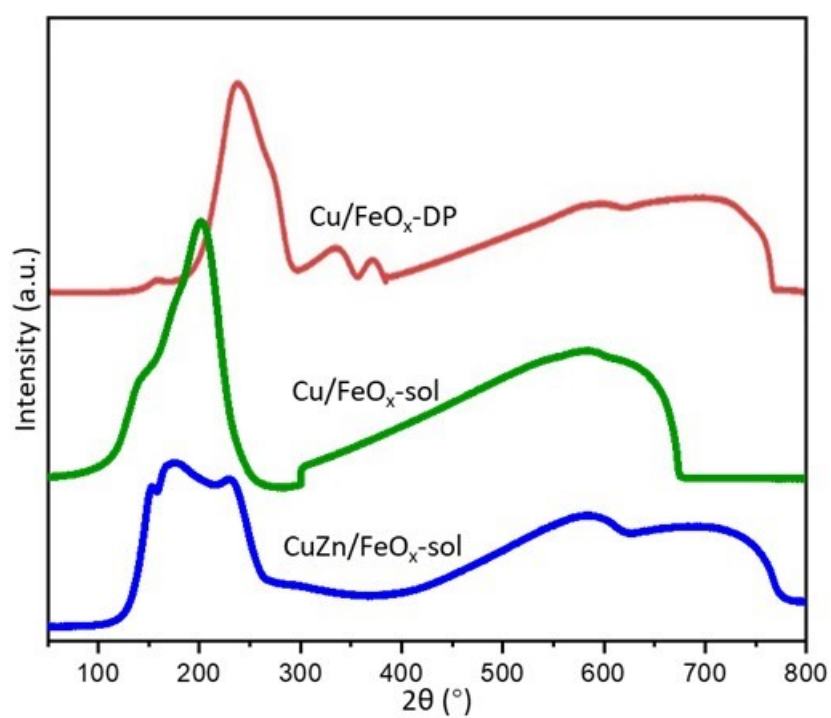

**Figure S2.** H<sub>2</sub>-TPR profiles of precursors after calcined at 500 °C without further thermal reduction: sol-gel derived Cu/FeO<sub>x</sub>-sol and CuZn/FeO<sub>x</sub>-sol precursors; DP derived Cu/FeO<sub>x</sub>-DP precursor.

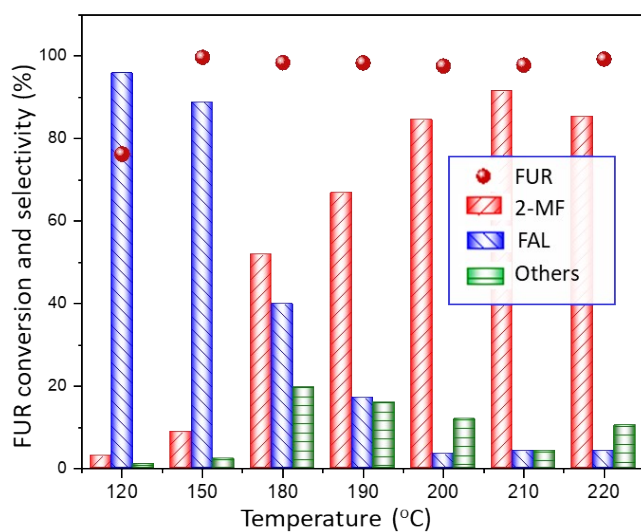

**Figure S3.** Catalytic performance of CuZn/FeO<sub>x</sub>(280) for the CTH process of FUR as a function of reaction temperature. Reaction conditions: molar ratio of furfural/isopropanol = 0.02, 200 mg of catalyst, 4 h, 0.1 MPa N<sub>2</sub>. FUR: furfural, 2-MF: 2-methylfuran, FAL: furfuryl alcohol. Other products including condensation and coupling products with minor amount of  $\gamma$ -valerolactone.

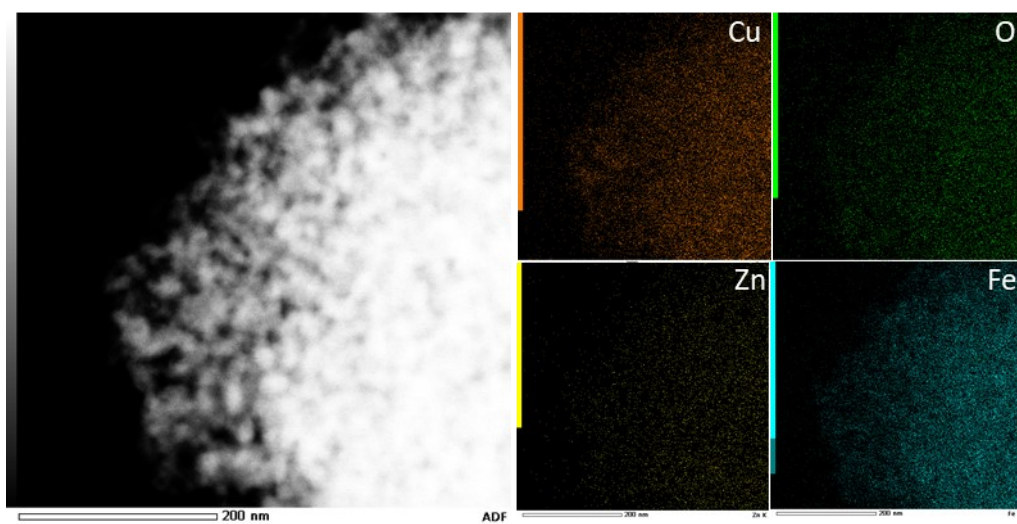

**Figure S4.** HAADF-STEM elemental mappings of CuZn/FeO<sub>x</sub>(250).

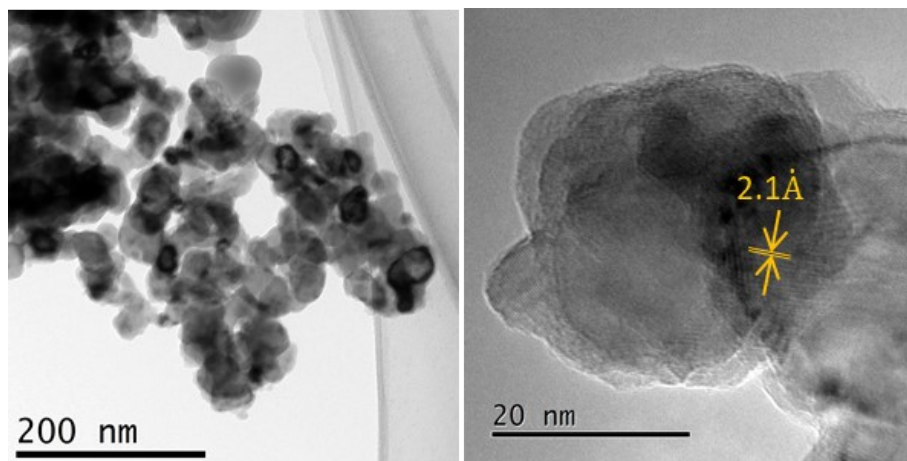

**Figure S5.** TEM images of CuZn/FeO<sub>x</sub>(280) catalyst.

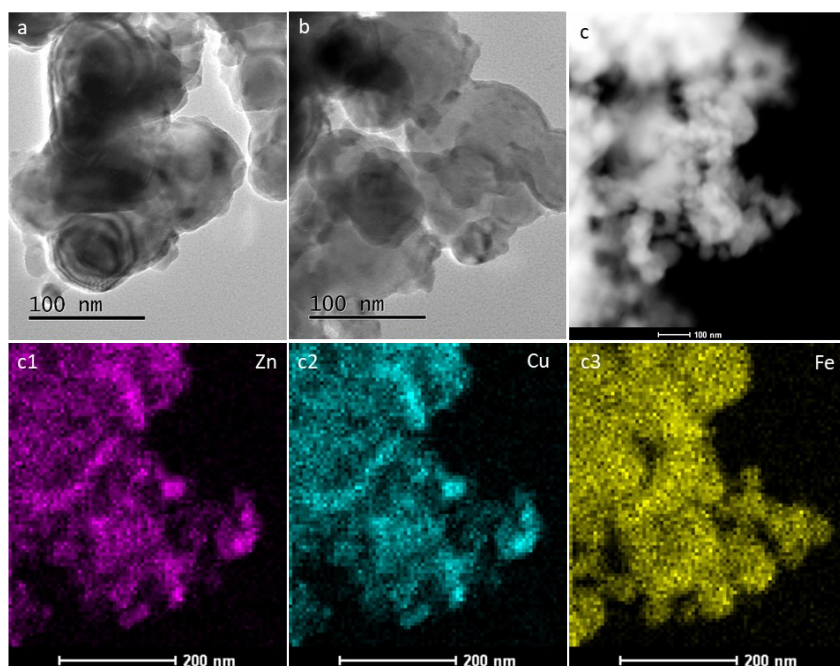

**Figure S6.** TEM images and HAADF-STEM elemental mappings of CuZn/FeO<sub>x</sub>(350).

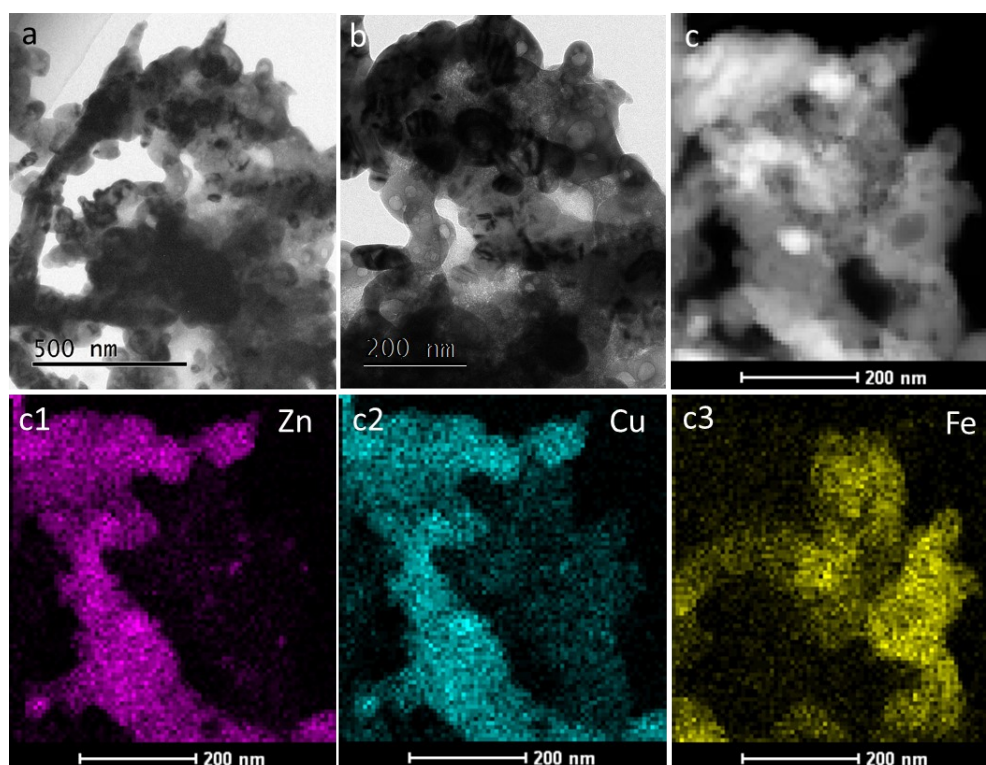

**Figure S7.** TEM images and HAADF-STEM elemental mappings of CuZn/FeO<sub>x</sub>(DP) synthesized by deposition-precipitation.

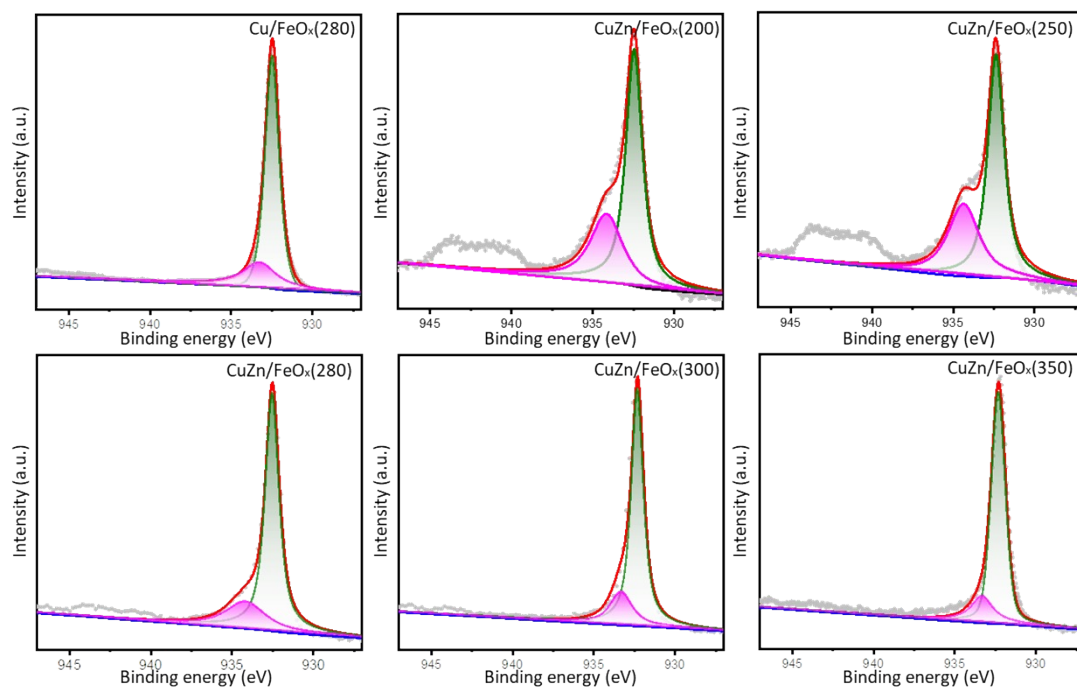

**Figure S8.** XPS spectra of Cu 2p core level of the Cu/FeO<sub>x</sub> and CuZn/FeO<sub>x</sub> catalysts.

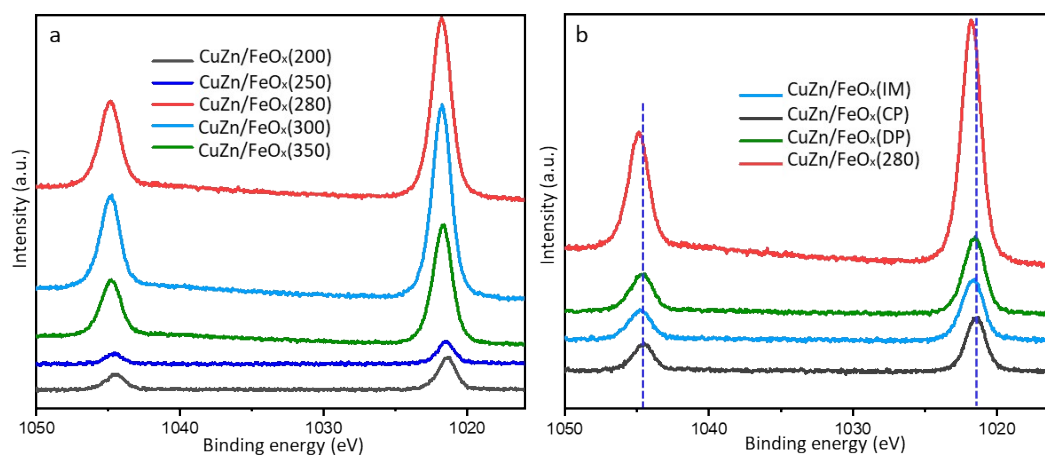

**Figure S9.** XPS spectra of Zn 2*p* core level of (a) Cu/FeO<sub>x</sub> and CuZn/FeO<sub>x</sub> by sol-gel methods, and (b) CuZn/FeO<sub>x</sub> catalysts by conventional methods pre-reduced at 280 °C.

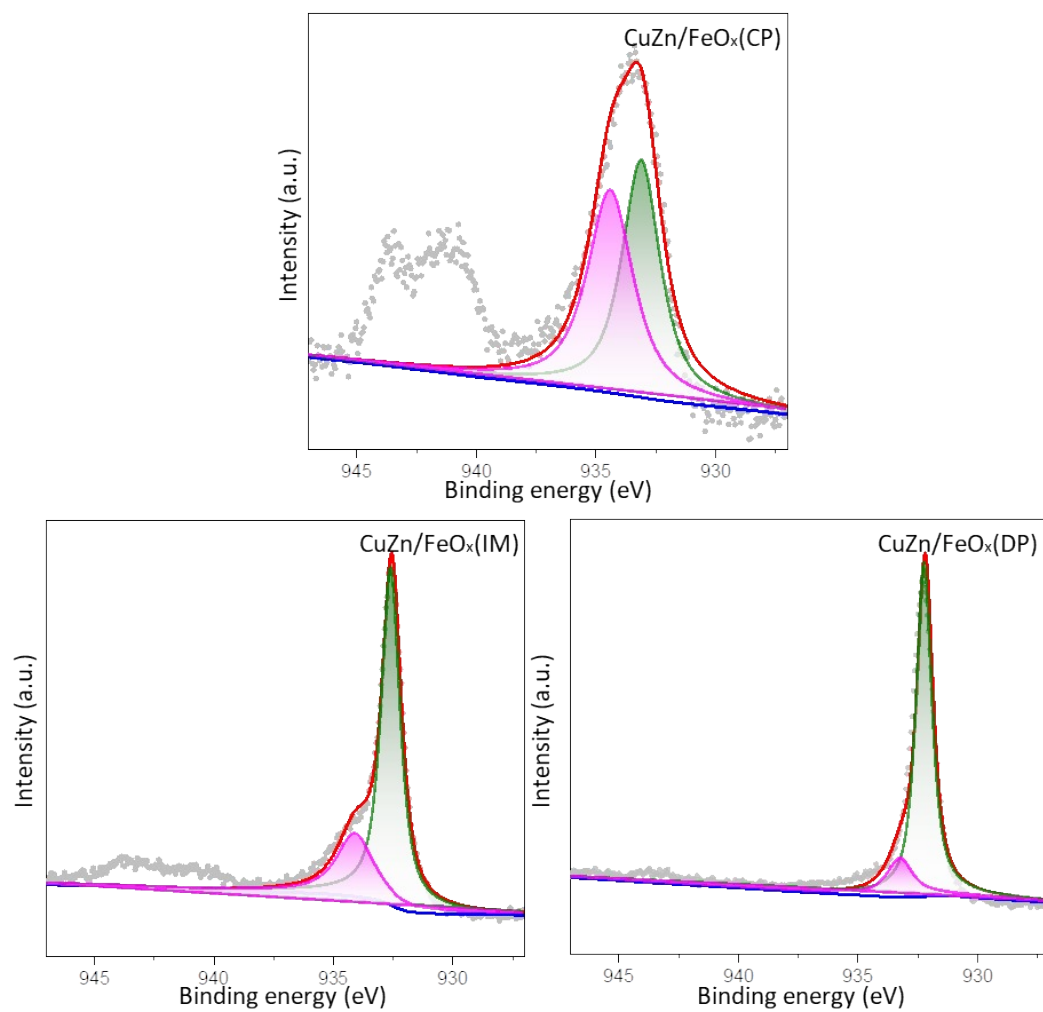

**Figure S10.** XPS spectra of Cu 2*p* core level of the CuZn/FeO<sub>x</sub> catalysts by different methods.

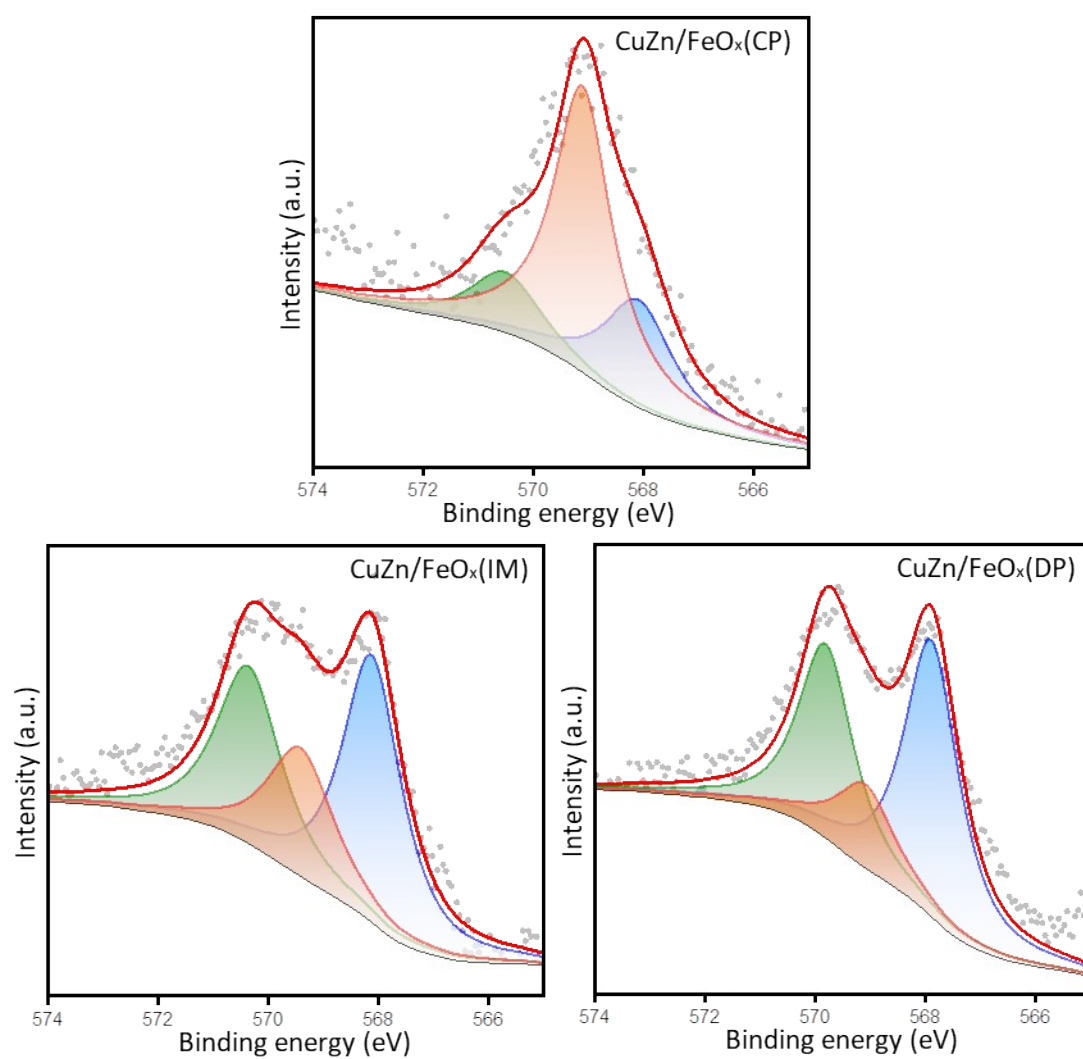

**Figure S11.** Cu LMM XPS spectra of the CuZn/FeO<sub>x</sub> catalysts by different methods.

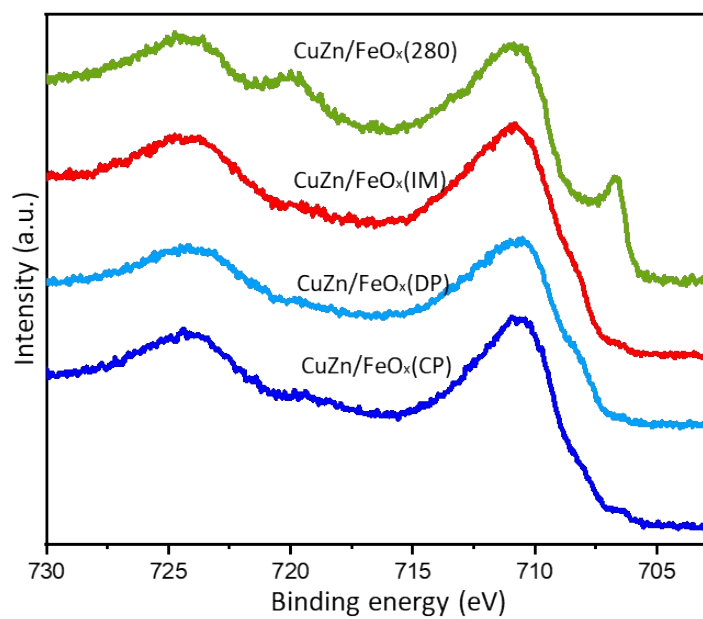

**Figure S12.** XPS spectra of Fe 2p core level of the CuZn/FeO<sub>x</sub> catalysts by different methods.

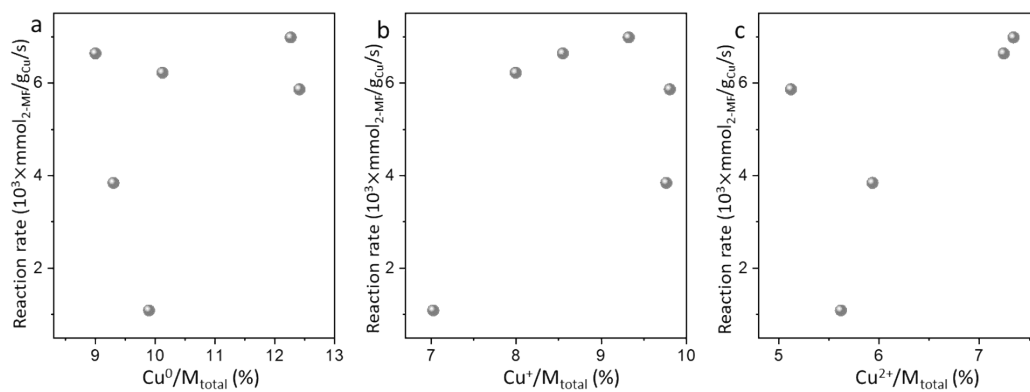

Figure S13. The reaction rates by different catalysts changed with the (a) surface percentage of Cu<sup>0</sup>, (b) percentage of Cu<sup>+</sup>, and (c) percentage of Cu<sup>2+</sup>. There was no clear tendency between the reaction rates and the percentages of surface copper species. The Cu/M<sub>total</sub> was standardized by the atomic ratio of copper species in the total metal elements (Cu+Fe+Zn).

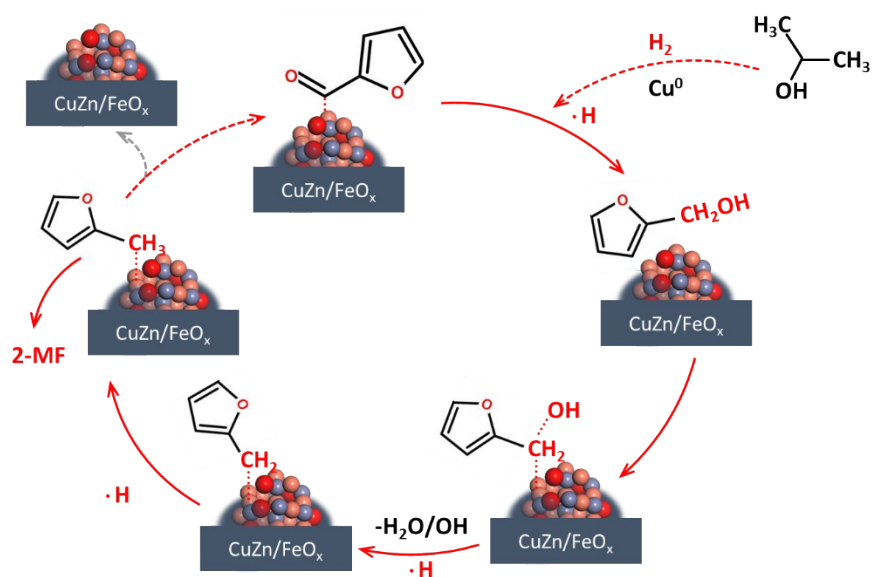

Figure S14. The CTH reaction mechanism of FUR using CuZn/FeO<sub>x</sub> catalysts. The origin ball, purple ball, and red ball suggested the Cu, Zn and O atoms.

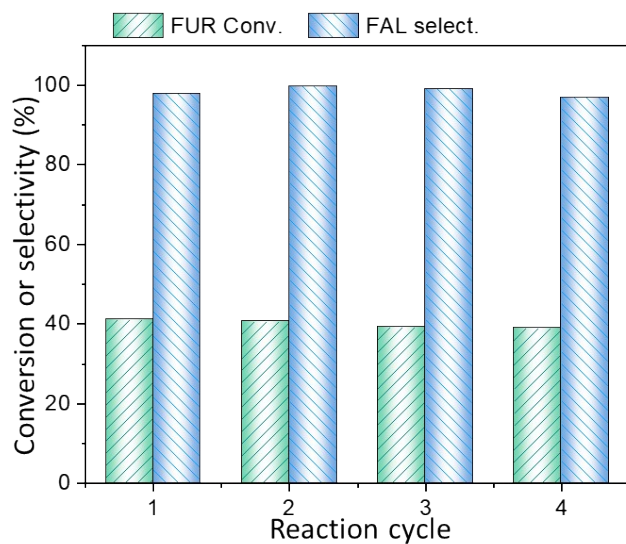

Figure S15. FUR conversion and product distribution during cycle reaction by CuZn/FeO<sub>x</sub>(280). Reaction condition: molar ratio of furfural/isopropanol = 0.02, 100 mg of catalyst, 180 °C for 4 h, 0.1 MPa N<sub>2</sub>. FUR: furfural, FAL: furfuryl alcohol.

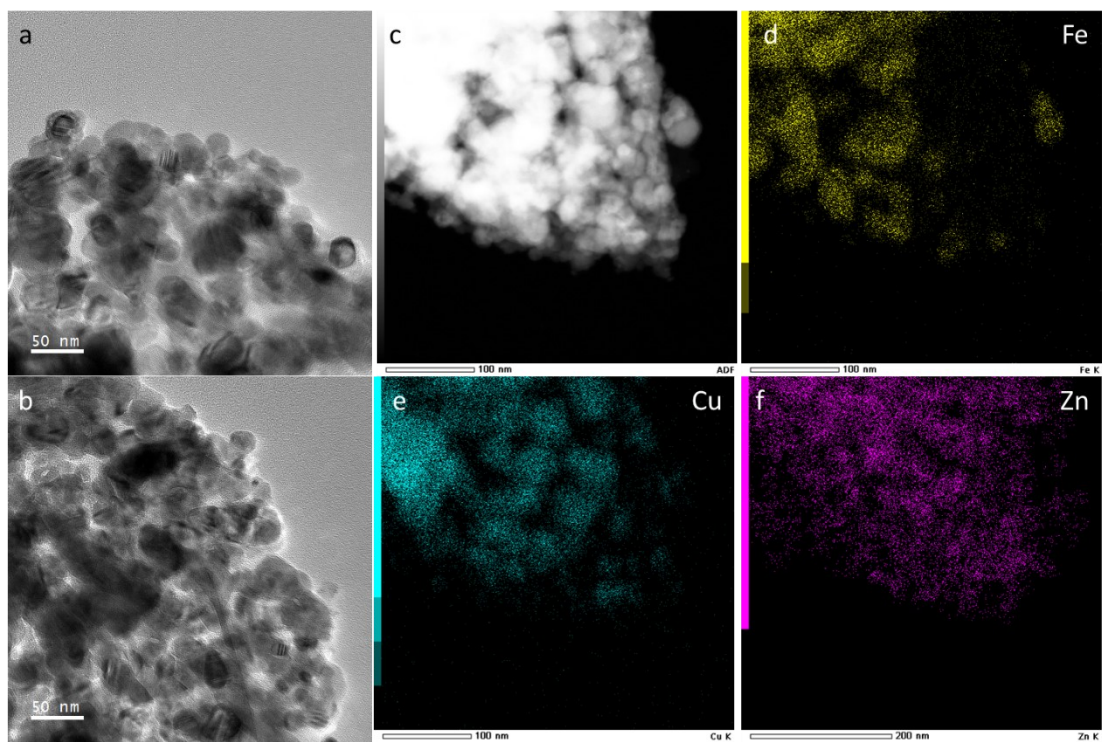

Figure S16. TEM images and the HAADF-STEM elemental mappings of CuZn/FeO<sub>x</sub>(280) after reaction.

**Table S1.** Structure and surface information of Cu catalysts according to XRD and XPS data.

| Sample                      | Method                   | Pre-reduction | $d_{\text{Cu}(111)}^a$ | Surface composition (%) |                                                      |                                   |
|-----------------------------|--------------------------|---------------|------------------------|-------------------------|------------------------------------------------------|-----------------------------------|
|                             |                          | T (°C)        |                        | Cu <sup>0</sup>         | (Cu <sup>0</sup> +Cu <sup>+</sup> )/Cu <sup>2+</sup> | Cu <sup>+</sup> / Cu <sup>0</sup> |
| Cu/FeO <sub>x</sub> (280)   | Sol-gel                  | 280           | 18.4                   | 37.2                    | 3.51                                                 | 1.05                              |
| CuZn/FeO <sub>x</sub> (200) |                          | 200           | 8.3                    | 36.3                    | 2.46                                                 | 0.95                              |
| CuZn/FeO <sub>x</sub> (250) |                          | 250           | 9.6                    | 42.4                    | 3.45                                                 | 0.76                              |
| CuZn/FeO <sub>x</sub> (280) |                          | 280           | 11.6                   | 45.9                    | 4.63                                                 | 0.79                              |
| CuZn/FeO <sub>x</sub> (300) |                          | 300           | 15.7                   | 45.4                    | 4.35                                                 | 0.79                              |
| CuZn/FeO <sub>x</sub> (350) |                          | 350           | 26.6                   | 43.9                    | 6.65                                                 | 0.71                              |
| CuZn/FeO <sub>x</sub> (CP)  | Co-precipitation         |               | 18.3                   | 24.8                    | 0.63                                                 | 0.56                              |
| CuZn/FeO <sub>x</sub> (DP)  | Deposition-precipitation | 280           | 21.7                   | 48.7                    | 4.84                                                 | 0.70                              |
| CuZn/FeO <sub>x</sub> (IM)  | Impregnation             |               | 19.8                   | 44.4                    | 3.19                                                 | 0.72                              |

<sup>a</sup> Average sizes of Cu particles estimated by Scherrer equation based on the peak width at half height of Cu (111) diffraction peaks.

**Table S2.** Surface acid sites in terms of the NH<sub>3</sub> desorption amount based on the NH<sub>3</sub>-TPD profiles.

| Sample                      | NH <sub>3</sub> desorption (NH <sub>3</sub> mmol/g) |        |        |       |
|-----------------------------|-----------------------------------------------------|--------|--------|-------|
|                             | Weak                                                | Medium | Strong | Total |
| Cu/FeO <sub>x</sub> (280)   | 0.017                                               | 0.008  | 0.005  | 0.030 |
| CuZn/FeO <sub>x</sub> (250) | 0.019                                               | 0.010  | 0.030  | 0.059 |
| CuZn/FeO <sub>x</sub> (280) | 0.014                                               | 0.011  | 0.011  | 0.036 |
| CuZn/FeO <sub>x</sub> (300) | 0.013                                               | 0.012  | 0.004  | 0.029 |
| CuZn/FeO <sub>x</sub> (350) | 0.013                                               | 0.009  | 0.005  | 0.027 |

**Table S3.** Comparison of specific rates in the current work and the reported literature.

| Catalyst                                          | T (°C) | 2-MF yield | Specific rate<br>( $\mu\text{mol}_{2-\text{MF}}/\text{g}_\text{M}/\text{s}$ ) | Ref.      |
|---------------------------------------------------|--------|------------|-------------------------------------------------------------------------------|-----------|
| CuZn/FeO <sub>x</sub> (280)                       | 190    | 66.8       | 6.2                                                                           | This work |
| CuZn/FeO <sub>x</sub> (280)                       | 210    | 92.0       | 8.6                                                                           | This work |
| Cu/FeO <sub>x</sub> -C5H                          | 220    | 80.5       | 2.2                                                                           | [1]       |
| NiCuAl                                            | 200    | 41.1       | 1.5                                                                           | [2]       |
| 10Cu3Pd/ZrO <sub>2</sub>                          | 220    | 61.9       | 0.4                                                                           | [3]       |
| Cu <sub>2.5</sub> Zn-Al-600                       | 180    | 72.0       | 2.1                                                                           | [4]       |
| 5Cu3Re/Al <sub>2</sub> O <sub>3</sub>             | 220    | 94.0       | 3.4                                                                           | [5]       |
| 10%Ni-10%Cu                                       | 210    | 73.6       | 4.6                                                                           | [6]       |
| Cu/SiO <sub>2</sub> -HT                           | 220    | 90.0       | 12.8 <sup>a</sup>                                                             | [7]       |
| Ru/C                                              | 180    | 61.0       | 0.3                                                                           | [8]       |
| Ru <sub>4</sub> /NiFe <sub>2</sub> O <sub>4</sub> | 200    | 79.0       | 0.8                                                                           | [9]       |

<sup>a</sup> Initial N<sub>2</sub> pressure was kept at 2.1 MPa.

## References

- [1] J.J. Luo, Y. Cheng, H.Y. Niu, T. Wang, C.H. Liang, *J Catal*, 413 (2022) 575-587.
- [2] M. Kalong, P. Hongmanorom, S. Ratchahat, W. Koo-amornpattana, K. Faungnawakij, S. Assabumrungrat, A. Srifa, S. Kawi, *Fuel Process Technol*, 214 (2021) 106721.
- [3] X. Chang, A.F. Liu, B. Cai, J.Y. Luo, H. Pan, Y.B. Huang, *Chemsuschem*, 9 (2016) 3330-3337.
- [4] H.Y. Niu, J.J. Luo, C. Li, B.W. Wang, C.H. Liang, *Industrial & Engineering Chemistry Research*, 58 (2019) 6298-6308.
- [5] K. Zhou, J.X. Chen, Y.J. Cheng, Z.T. Chen, S.M. Kang, Z.D. Cai, Y.J. Xu, J.J. Wei, *ACS Sustainable Chemistry & Engineering*, 8 (2020) 16624-16636.
- [6] Z. Fu, Z. Wang, W. Lin, W. Song, S. Li, *Applied Catalysis A: General*, 547 (2017) 248-255.
- [7] B. Li, L. Li, H. Sun, C. Zhao, *ACS Sustainable Chemistry & Engineering*, 6 (2018) 12096-12103.
- [8] M.J. Gilkey, P. Panagiotopoulou, A.V. Mironenko, G.R. Jenness, D.G. Vlachos, B.J. Xu, *Acs Catal*, 5 (2015) 3988-3994.
- [9] B. Wang, C. Li, B. He, J. Qi, C. Liang, *Journal of Energy Chemistry*, 26 (2017) 799-807.
